# Supplementary material for: Homoleptic tris-cyclometalated iridium complexes with 2-phenylbenzothiazole ligands for highly efficient orange OLEDs
Source: Royal Society of Chemistry journal article supplement (doi:10.1039/c1jm10757g), 2011-01-01
Supplement: c1jm10757g.pdf [file c1jm10757g.pdf]

## Supporting Information

For: Journal of Materials Chemistry C1JM10757G

# Homoleptic Tris-cyclometalated Iridium Complexes with 2-Phenylbenzothiazole Ligands for Highly Efficient Orange OLEDs)

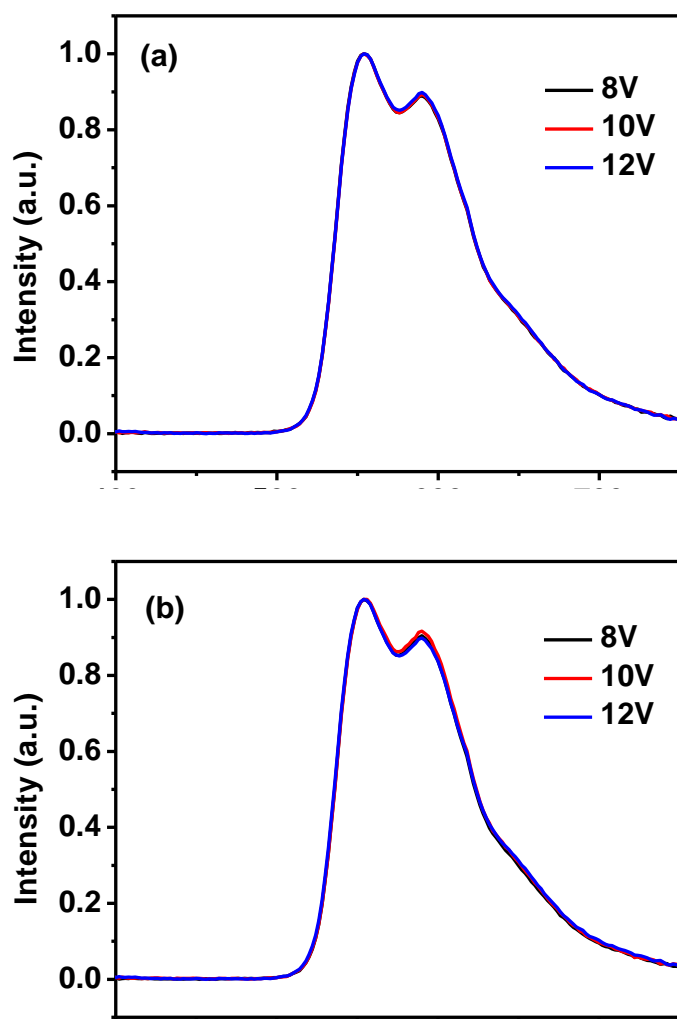

**Fig. S1** Normalized EL spectra of complex **4** in device I (a) and II (b) at different voltages.

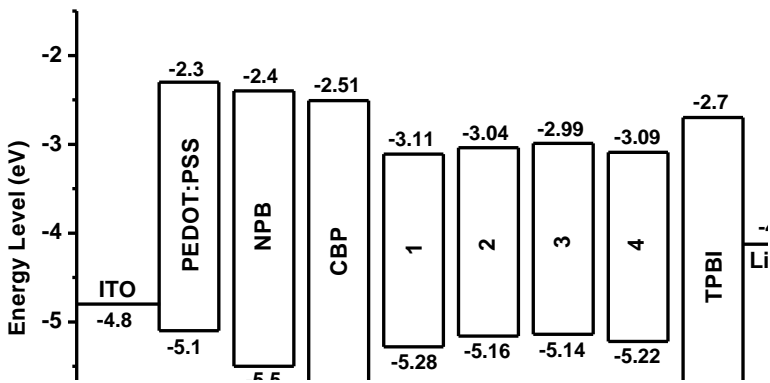

**Fig S2.** Energy level diagram of the materials used in the devices.
